# Supplementary material for: A parasitic fungus employs mutated eIF4A to survive on rocaglate-synthesizing Aglaia plants
Source: eLife journal article supplement (doi:10.7554/elife.81302), 2023-01-13
Supplement: fig2-figsupp2-data1 [file Figure 2-figure supplement 2A-H-source data 1.xlsx]

## Sheet: H. sapiens WT Phe163
[AG]10
ADP + Pi
RocA
Protein concentration [μM]	Replicate 1	Replicate 2	Replicate 3	Mean	s.d.
0.01	0.191257	0.117486	-0.0628418	0.0819669	0.13072
0.025	0.23224	-0.0300549	-0.128416	0.0245899	0.186434
0.05	0.215847	0.0683057	0.0109287	0.0983604	0.105713
0.075	0.199453	0.0846992	-0.0792352	0.0683057	0.140066
0.1	0.289617	0.191257	0.0519123	0.177595	0.11944
0.25	0.469945	0.25683	0.18306	0.303278	0.148976
0.5	0.63388	0.592896	0.560109	0.595628	0.0369611
0.75	0.830601	0.674863	0.699453	0.734972	0.0837243
1	0.740437	0.674863	0.63388	0.68306	0.0537495
2.5	0.953552	0.797814	0.748634	0.833333	0.106977
5	1.0847	0.887978	0.871584	0.948087	0.118593
7.5	0.928961	0.879781	0.838798	0.882513	0.045144
10	1.01913	0.994535	0.896175	0.969945	0.0650595
25	1.10929	1.03552	0.986339	1.04372	0.0618839
50	1.24863	1.03552	0.994535	1.0929	0.136421

## Sheet: H. sapiens Phe163His
[AG]10
ADP + Pi
RocA
Protein concentration [μM]	Replicate 1	Replicate 2	Replicate 3	Mean	s.d.
0.01	0.0710383	-0.0601093	-0.101093	-0.0300546	0.0899152
0.025	-0.0191257	-0.0437158	0.0382514	-0.00819672	0.0420623
0.05	0.0300546	0.00546448	-0.0601093	-0.00819672	0.0466085
0.075	0.0300546	0.0136612	0.0218579	0.0218579	0.00819672
0.1	0.0464481	-0.0191257	0.0218579	0.0163934	0.0331267
0.25	0.0710383	0.0382514	-0.00273224	0.0355191	0.0369611
0.5	0.0464481	0.103825	0.0956284	0.0819672	0.0310323
0.75	0.144809	-0.0191257	0.079235	0.068306	0.0825119
1	0.251366	0.169399	0.0874317	0.169399	0.0819672
2.5	0.177596	0.275956	0.259563	0.237705	0.0526975
5	0.34153	0.36612	0.284153	0.330601	0.0420623
7.5	0.357923	0.497268	0.39071	0.415301	0.0728541
10	0.693989	0.530055	0.505464	0.576503	0.102486
25	0.636612	0.702186	0.554645	0.631148	0.0739221
50	0.726776	0.857923	0.89071	0.825137	0.0867459

## Sheet: H. sapiens Phe163Gly
[AG]10
ADP + Pi
RocA
Protein concentration [μM]	Replicate 1	Replicate 2	Replicate 3	Mean	s.d.
0.01	0.142076	0.0519123	-0.0464484	0.0491801	0.094292
0.025	0.174863	-0.120219	-0.177596	-0.0409839	0.189118
0.05	0.23224	-0.0300549	-0.120219	0.0273221	0.183101
0.075	0.060109	-0.0218582	-0.112022	-0.0245904	0.0860981
0.1	-0.0300549	-0.0136615	-0.0136615	-0.019126	0.00946476
0.25	0.0109287	-0.0710385	-0.153006	-0.0710385	0.0819672
0.5	0.0765025	0.0437156	-0.193989	-0.0245904	0.147617
0.75	0.18306	-0.0546451	-0.202186	-0.0245904	0.194374
1	0.109289	-0.0628418	-0.103825	-0.019126	0.113083
2.5	0.379781	0.0846992	0.0191254	0.161202	0.192114
5	0.363388	0.224043	0.0846992	0.224043	0.139344
7.5	0.379781	0.0355189	0.101093	0.172131	0.182795
10	0.396175	0.15847	0.273224	0.275956	0.118876
25	0.740437	0.527322	0.273224	0.513661	0.233906
50	0.75683	0.543716	0.445355	0.581967	0.159222

## Sheet: O. sinensis WT His154
[AG]10
ADP + Pi
RocA
Protein concentration [μM]	Replicate 1	Replicate 2	Replicate 3	Mean	s.d.
0.01	0.199454	0.469945	0.101093	0.256831	0.191003
0.025	0.404372	0.215847	0.256831	0.29235	0.0991544
0.05	0.445355	0.510929	0.453552	0.469945	0.0357287
0.075	0.63388	0.527322	0.65847	0.606557	0.0697123
0.1	0.773224	0.674863	0.666667	0.704918	0.0592965
0.25	1.42896	1.36339	1.26503	1.35246	0.0825119
0.5	1.78142	1.67486	1.68306	1.71311	0.0592965
0.75	1.72404	1.8224	1.72404	1.75683	0.0567886
1	1.8224	1.81421	1.8224	1.81967	0.00473238
2.5	1.94536	1.91257	1.88798	1.9153	0.0287859
5	1.91257	1.87158	1.87978	1.88798	0.0216865
7.5	1.85519	1.90437	1.88798	1.88251	0.0250414
10	1.92077	1.89617	1.86339	1.89344	0.0287859
25	1.86339	1.91257	1.80601	1.86066	0.0533312
50	1.81421	1.79781	1.78962	1.80055	0.0125207

## Sheet: O. sinensis His154Gly
[AG]10
ADP + Pi
RocA
Protein concentration [μM]	Replicate 1	Replicate 2	Replicate 3	Mean	s.d.
0.01	0.103825	0.103825	-0.0273224	0.0601093	0.0757181
0.025	0.0710383	0.161202	-0.0355191	0.0655738	0.0984744
0.05	0.103825	0.128415	0.128415	0.120219	0.0141971
0.075	0.128415	0.161202	0.112022	0.13388	0.0250414
0.1	0.210383	0.128415	0.153005	0.163934	0.0420623
0.25	0.39071	0.275956	0.357923	0.34153	0.0591074
0.5	0.685792	0.784153	0.595628	0.688525	0.094292
0.75	0.636612	0.587432	0.603825	0.60929	0.0250414
1	0.907104	0.948087	0.76776	0.874317	0.0945292
2.5	1.50546	1.59563	1.49727	1.53279	0.0545765
5	1.62842	1.6612	1.65301	1.64754	0.0170628
7.5	1.6776	1.53005	1.64481	1.61749	0.0774724
10	1.61202	1.73497	1.71038	1.68579	0.0650595
25	1.75956	1.75137	1.69399	1.73497	0.0357287
50	1.73497	1.75956	1.74317	1.7459	0.0125207

## Sheet: BRM1 Gly172Phe
[AG]10
ADP + Pi
RocA
Protein concentration [μM]	Replicate 1	Replicate 2	Replicate 3	Mean	s.d.
0.01	-0.0218582	-0.136612	-0.120219	-0.0928964	0.0620646
0.025	0.0683057	-0.0710385	-0.226776	-0.076503	0.147617
0.05	-0.0464484	-0.153006	-0.136612	-0.112022	0.057377
0.075	-0.0300549	-0.00546475	-0.128416	-0.0546451	0.0650595
0.1	0.0928959	0.060109	0.00273197	0.0519123	0.0456374
0.25	0.191257	0.101093	0.0355189	0.109289	0.0781917
0.5	0.314207	0.379781	0.248634	0.314207	0.0655738
0.75	0.428961	0.306011	0.363388	0.36612	0.0615209
1	0.355191	0.428961	0.428961	0.404371	0.0425914
2.5	0.404371	0.338798	0.379781	0.374317	0.0331267
5	0.478142	0.420765	0.420765	0.43989	0.0331267
7.5	0.551912	0.543716	0.502732	0.532787	0.0263488
10	0.437158	0.510929	0.568306	0.505464	0.0657443
25	0.543716	0.560109	0.486339	0.530054	0.0387362
50	0.576502	0.551912	0.453552	0.527322	0.0650595

## Sheet: BRM1 Gly172His
[AG]10
ADP + Pi
RocA
Protein concentration [μM]	Replicate 1	Replicate 2	Replicate 3	Mean	s.d.
0.01	-0.155738	-0.0409836	-0.237705	-0.144809	0.098815
0.025	-0.0983607	-0.106557	-0.00819672	-0.0710383	0.0545765
0.05	-0.0819672	-0.155738	-0.0245902	-0.0874317	0.0657443
0.075	-0.057377	-0.122951	-0.00819672	-0.0628415	0.0575719
0.1	-0.057377	-0.0819672	-0.0983607	-0.079235	0.020628
0.25	0.057377	0.0327869	0.0901639	0.0601093	0.0287859
0.5	0.245902	0.254098	0.295082	0.265027	0.0263488
0.75	0.319672	0.344262	0.180328	0.281421	0.0884081
1	0.47541	0.5	0.467213	0.480874	0.0170628
2.5	0.491803	0.540984	0.401639	0.478142	0.0706695
5	0.459016	0.663934	0.745902	0.622951	0.147768
7.5	0.827869	0.803279	0.762295	0.797814	0.0331267
10	0.52459	0.590164	0.581967	0.565574	0.0357287
25	0.819672	0.877049	0.92623	0.874317	0.0533312
50	1.03279	0.967213	1.0082	1.00273	0.0331267

## Sheet: BRM1 WT Gly172
[AG]10
ADP + Pi
RocA
Protein concentration [μM]	Replicate 1	Replicate 2	Replicate 3	Mean	s.d.
0.01	0.0928959	-0.0628418	-0.0628418	-0.0109292	0.0899152
0.025	-0.202186	-0.161202	-0.120219	-0.161202	0.0409836
0.05	-0.0464484	-0.153006	-0.21858	-0.139345	0.0868749
0.075	-0.0382516	-0.0218582	-0.226776	-0.0956287	0.113872
0.1	-0.0546451	-0.0956287	-0.112022	-0.087432	0.0295537
0.25	-0.308743	-0.259563	-0.325137	-0.297814	0.0341257
0.5	-0.24317	-0.29235	-0.349727	-0.295082	0.0533312
0.75	-0.31694	-0.36612	-0.357924	-0.346995	0.0263488
1	-0.185793	-0.210383	-0.374317	-0.256831	0.102486
2.5	-0.103825	-0.226776	-0.234973	-0.188525	0.0734663
5	-0.0300549	-0.144809	-0.161202	-0.112022	0.0714574
7.5	-0.087432	-0.120219	-0.153006	-0.120219	0.0327869
10	0.0437156	-0.00546475	-0.0300549	0.00273197	0.0375621
25	0.363388	0.265027	0.25683	0.295082	0.0592965
50	0.363388	0.420765	0.428961	0.404371	0.0357287
