# Supplementary material for: A parasitic fungus employs mutated eIF4A to survive on rocaglate-synthesizing Aglaia plants
Source: eLife journal article supplement (doi:10.7554/elife.81302), 2023-01-13
Supplement: fig2-figsupp3-data1 [file Figure 2-figure supplement 3A-H-source data 1.xlsx]

## Sheet: H. sapiens WT Phe163
[AG]10							[AG]10
AMP-PNP							AMP-PNP
DMSO							RocA
Protein concentration [μM]	Replicate 1	Replicate 2	Replicate 3	Mean	s.d.		Protein concentration [μM]	Replicate 1	Replicate 2	Replicate 3	Mean	s.d.
0.01	-0.0273221	0.0464484	-0.150273	-0.0437156	0.09938		0.01	0.349727	0.251366	0.0628418	0.221312	0.145785
0.025	0.234973	0.0546451	-0.0191254	0.0901642	0.13072		0.025	0.76776	0.562842	0.36612	0.565574	0.200834
0.05	0.0628418	0.308743	-0.101093	0.0901642	0.20628		0.05	0.833334	0.808743	0.538252	0.726776	0.163729
0.075	0.0382516	0.00546475	-0.0355189	0.00273251	0.0369611		0.075	0.661202	0.464481	0.36612	0.497268	0.150248
0.1	0.226776	0.144809	0.0792352	0.150273	0.0739221		0.1	0.710383	0.800547	0.784153	0.765028	0.0480284
0.25	-0.215847	-0.215847	-0.215847	-0.215847	3.39935e-17		0.25	1.00546	1.12022	1.01366	1.04645	0.0640184
0.5	-0.150273	-0.199453	-0.142076	-0.163934	0.0310323		0.5	0.956284	1.09563	0.997268	1.01639	0.0716139
0.75	-0.297814	-0.248634	-0.0765025	-0.20765	0.116209		0.75	0.989071	1.08743	0.948088	1.0082	0.0716139
1	-0.060109	-0.15847	0.0136615	-0.0683057	0.0863578		1	1.03005	1.05465	1.06284	1.04918	0.0170628
2.5	0.202186	0.284153	0.234973	0.240437	0.0412559		2.5	1.1612	1.1612	1.07924	1.13388	0.0473238
5	0.390711	0.357924	0.34153	0.363388	0.0250414		5	1.07104	1.00546	1.06284	1.04645	0.0357287
7.5	0.472678	0.505465	0.431694	0.469946	0.0369611		7.5	1.12842	1.11202	1.12842	1.12295	0.00946476
10	0.636612	0.579235	0.587432	0.601093	0.0310323		10	1.14481	1.15301	1.1694	1.15574	0.0125207
25	0.74317	0.79235	0.74317	0.759563	0.0283943		25	1.11202	1.10383	1.21038	1.14208	0.0592965
50	0.81694	0.833334	0.734973	0.795082	0.0526975		50	1.10383	1.22678	1.12022	1.15027	0.0667584

## Sheet: H. sapiens Phe163His
[AG]10							[AG]10
AMP-PNP							AMP-PNP
DMSO							RocA
Protein concentration [μM]	Replicate 1	Replicate 2	Replicate 3	Mean	s.d.		Protein concentration [μM]	Replicate 1	Replicate 2	Replicate 3	Mean	s.d.
0.01	0.0874317	-0.0355191	-0.0437158	0.00273224	0.0734663		0.01	-0.155738	0.114754	0.0245902	-0.00546448	0.137728
0.025	-0.10929	-0.117486	-0.0437158	-0.0901639	0.0404335		0.025	0.0737705	0.0655738	0.114754	0.0846995	0.0263488
0.05	0.0382514	-0.15847	-0.166667	-0.0956284	0.116016		0.05	0.0491803	0.0983607	0.106557	0.0846995	0.0310323
0.075	0.0218579	-0.0437158	-0.0191257	-0.0136612	0.0331267		0.075	0.278689	0.131148	0.106557	0.172131	0.0930969
0.1	-0.0519126	-0.0437158	0.00546448	-0.0300546	0.0310323		0.1	0.270492	0.352459	0.327869	0.31694	0.0420623
0.25	-0.00273224	-0.0191257	0.0300546	0.00273224	0.0250414		0.25	0.762295	0.737705	0.745902	0.748634	0.0125207
0.5	0.0382514	-0.0437158	-0.18306	-0.0628415	0.111888		0.5	0.770492	0.786885	0.827869	0.795082	0.0295537
0.75	-0.101093	-0.0928962	-0.0846995	-0.0928962	0.00819672		0.75	0.836066	0.803279	0.852459	0.830601	0.0250414
1	-0.068306	0.0218579	-0.0355191	-0.0273224	0.0456374		1	0.901639	0.918033	0.97541	0.931694	0.0387362
2.5	0.0710383	0.136612	0.0382514	0.0819672	0.0500828		2.5	1.13115	0.909836	0.983607	1.0082	0.112686
5	0.439891	0.31694	0.308743	0.355191	0.0734663		5	0.909836	0.983607	0.967213	0.953552	0.0387362
7.5	0.275956	0.210383	0.325137	0.270492	0.0575719		7.5	0.918033	0.893443	0.860656	0.89071	0.0287859
10	0.26776	0.39071	0.464481	0.374317	0.09938		10	0.909836	0.934426	1	0.948087	0.0466085
25	0.472678	0.530055	0.464481	0.489071	0.0357287		25	0.942623	1	0.901639	0.948087	0.0494075
50	0.595628	0.587432	0.620219	0.601093	0.0170628		50	0.983607	1.04918	0.967213	1	0.043373

## Sheet: H. sapiens Phe163Gly
[AG]10							[AG]10
AMP-PNP							AMP-PNP
DMSO							RocA
Protein concentration [μM]	Replicate 1	Replicate 2	Replicate 3	Mean	s.d.		Protein concentration [μM]	Replicate 1	Replicate 2	Replicate 3	Mean	s.d.
0.01	-0.0737705	-0.0327869	-0.139344	-0.0819672	0.0537495		0.01	0.0491803	-0.0819672	-0.147541	-0.0601093	0.100166
0.025	0.172131	-0.163934	-0.245902	-0.079235	0.221514		0.025	-0.0491803	-0.0327869	-0.057377	-0.0464481	0.0125207
0.05	-0.106557	-0.0901639	-0.295082	-0.163934	0.113872		0.05	0.131148	-0.0901639	-0.0983607	-0.0191257	0.130205
0.075	0.0163934	-0.368852	-0.385246	-0.245902	0.227302		0.075	-0.0409836	-0.139344	-0.0983607	-0.0928962	0.0494075
0.1	-0.106557	-0.139344	-0.270492	-0.172131	0.0867459		0.1	0.0737705	0.0245902	-0.0655738	0.010929	0.0706695
0.25	-0.352459	-0.42623	-0.377049	-0.385246	0.0375621		0.25	0.311475	0.237705	0.057377	0.202186	0.13072
0.5	-0.327869	-0.45082	-0.377049	-0.385246	0.0618839		0.5	0.598361	0.491803	0.401639	0.497268	0.0984744
0.75	-0.401639	-0.45082	-0.434426	-0.428962	0.0250414		0.75	0.45082	0.204918	0.114754	0.256831	0.173943
1	-0.213115	-0.434426	-0.47541	-0.374317	0.141101		1	0.508197	0.368852	0.368852	0.415301	0.0804504
2.5	0.131148	0	-0.0491803	0.0273224	0.0932171		2.5	0.721311	0.598361	0.54918	0.622951	0.0886611
5	0	-0.0245902	-0.155738	-0.0601093	0.0837243		5	0.713115	0.770492	0.754098	0.745902	0.0295537
7.5	0.139344	0.0327869	0.0737705	0.0819672	0.0537495		7.5	0.639344	0.672131	0.590164	0.63388	0.0412559
10	0.254098	0.254098	0.106557	0.204918	0.0851828		10	0.795082	0.745902	0.770492	0.770492	0.0245902
25	0.327869	0.204918	0.245902	0.259563	0.0626035		25	0.762295	0.721311	0.663934	0.715847	0.0494075
50	0.434426	0.401639	0.360656	0.398907	0.0369611		50	0.901639	0.762295	0.778689	0.814208	0.0761604

## Sheet: O. sinensis WT His154
[AG]10							[AG]10
AMP-PNP							AMP-PNP
DMSO							RocA
Protein concentration [μM]	Replicate 1	Replicate 2	Replicate 3	Mean	s.d.		Protein concentration [μM]	Replicate 1	Replicate 2	Replicate 3	Mean	s.d.
0.01	-0.00546448	0.10929	-0.0136612	0.0300546	0.0687418		0.01	0.114754	0.155738	0	0.0901639	0.0807283
0.025	0.215847	0.0928962	0.010929	0.106557	0.10314		0.025	0.311475	0.270492	0.188525	0.256831	0.0626035
0.05	0.0928962	0.101093	0.0601093	0.0846995	0.0216865		0.05	0.52459	0.52459	0.418033	0.489071	0.0615209
0.075	0.142077	0.142077	0.0437158	0.10929	0.0567886		0.075	0.532787	0.639344	0.680328	0.617486	0.0761604
0.1	0.240437	-0.0300546	-0.0464481	0.0546448	0.16111		0.1	0.868852	0.803279	0.704918	0.79235	0.0825119
0.25	0.166667	-0.0464481	0.010929	0.0437158	0.110276		0.25	1.28689	1.43443	1.27869	1.33333	0.0876449
0.5	-0.26776	-0.177596	-0.161202	-0.202186	0.057377		0.5	1.71311	1.63115	1.71311	1.68579	0.0473238
0.75	-0.128415	-0.177596	-0.120219	-0.142077	0.0310323		0.75	1.79508	1.7459	1.77049	1.77049	0.0245902
1	-0.103825	-0.0874317	-0.120219	-0.103825	0.0163934		1	1.86066	1.83607	1.77869	1.82514	0.0420623
2.5	0.10929	0.289617	0.166667	0.188525	0.0921296		2.5	1.95902	1.87705	1.87705	1.90437	0.0473238
5	0.543716	0.478142	0.396175	0.472678	0.0739221		5	1.78689	1.82787	1.81148	1.80874	0.020628
7.5	0.642077	0.568306	0.543716	0.584699	0.0511885		7.5	1.86885	1.87705	1.84426	1.86339	0.0170628
10	0.70765	0.584699	0.510929	0.601093	0.09938		10	1.83607	1.7459	1.79508	1.79235	0.045144
25	0.691257	0.68306	0.797814	0.724044	0.0640184		25	1.90164	1.77049	1.77869	1.81694	0.0734663
50	0.748634	0.691257	0.674863	0.704918	0.0387362		50	1.85246	1.78689	1.77049	1.80328	0.043373

## Sheet: O. sinensis His154Gly
[AG]10							[AG]10
AMP-PNP							AMP-PNP
DMSO							RocA
Protein concentration [μM]	Replicate 1	Replicate 2	Replicate 3	Mean	s.d.		Protein concentration [μM]	Replicate 1	Replicate 2	Replicate 3	Mean	s.d.
0.01	0.10929	-0.0628415	0.0437158	0.0300546	0.0868749		0.01	0.0437158	0.13388	-0.00546448	0.057377	0.0706695
0.025	-0.0874317	0.010929	-0.103825	-0.0601093	0.0620646		0.025	0.068306	0.0191257	0.0846995	0.057377	0.0341257
0.05	0.0765027	0.0355191	0.0355191	0.0491803	0.0236619		0.05	0.068306	0.142077	-0.0300546	0.0601093	0.0863578
0.075	0.0273224	0.010929	0.0928962	0.0437158	0.043373		0.075	0.068306	0.13388	0.150273	0.117486	0.043373
0.1	-0.0546448	-0.00546448	0.0191257	-0.0136612	0.0375621		0.1	0.166667	0.0846995	0.199454	0.150273	0.0591074
0.25	0.0191257	0.0928962	0.0601093	0.057377	0.0369611		0.25	0.691257	0.65847	0.63388	0.661202	0.0287859
0.5	0.0846995	0.0928962	0.125683	0.101093	0.0216865		0.5	1.14208	1.04372	0.953552	1.04645	0.094292
0.75	0.23224	0.174863	0.0928962	0.166667	0.0700328		0.75	0.945355	1.04372	0.912568	0.967213	0.0682513
1	0.142077	0.199454	0.199454	0.180328	0.0331267		1	1.17486	1.16667	1.10929	1.15027	0.0357287
2.5	0.551913	0.478142	0.387978	0.472678	0.0821037		2.5	1.53552	1.55191	1.48634	1.52459	0.0341257
5	0.535519	0.543716	0.560109	0.546448	0.0125207		5	1.5847	1.5765	1.60109	1.58743	0.0125207
7.5	0.576503	0.535519	0.584699	0.565574	0.0263488		7.5	1.51093	1.56011	1.60109	1.55738	0.045144
10	0.765027	0.666667	0.65847	0.696721	0.0592965		10	1.67486	1.56011	1.66667	1.63388	0.0640184
25	0.674863	0.748634	0.740437	0.721311	0.0404335		25	1.5847	1.69945	1.62568	1.63661	0.0581524
50	0.740437	0.822404	0.748634	0.770492	0.045144		50	1.65027	1.62568	1.69126	1.65574	0.0331267

## Sheet: BRM1 Gly172Phe
[AG]10							[AG]10
AMP-PNP							AMP-PNP
DMSO							RocA
Protein concentration [μM]	Replicate 1	Replicate 2	Replicate 3	Mean	s.d.		Protein concentration [μM]	Replicate 1	Replicate 2	Replicate 3	Mean	s.d.
0.01	0.0628418	0.0464484	-0.338798	-0.0765025	0.227302		0.01	0.352459	0.221311	0.0409836	0.204918	0.156383
0.025	-0.166666	-0.060109	-0.117486	-0.114754	0.0533312		0.025	0.139344	0.106557	0.131148	0.125683	0.0170628
0.05	-0.396175	-0.527322	-0.379781	-0.434426	0.0808669		0.05	0.385246	0.295082	0.278689	0.319672	0.057377
0.075	-0.0928959	-0.0928959	-0.322404	-0.169399	0.132507		0.075	0.319672	0.360656	0.336066	0.338798	0.020628
0.1	-0.20765	-0.142076	-0.191257	-0.180328	0.0341257		0.1	0.721311	0.762295	0.754098	0.745902	0.0216865
0.25	-0.560109	-0.494535	-0.625683	-0.560109	0.0655738		0.25	0.721311	0.778689	0.754098	0.751366	0.0287859
0.5	-0.240437	-0.23224	-0.15847	-0.210382	0.045144		0.5	0.868852	0.819672	0.754098	0.814208	0.0575719
0.75	-0.330601	-0.494535	-0.494535	-0.43989	0.0946476		0.75	0.811475	0.713115	0.729508	0.751366	0.0526975
1	-0.387978	-0.412568	-0.412568	-0.404371	0.0141971		1	0.827869	0.893443	0.754098	0.825137	0.0697123
2.5	-0.248634	-0.355191	-0.338798	-0.314207	0.057377		2.5	0.827869	0.795082	0.844262	0.822404	0.0250414
5	-0.338798	-0.314207	-0.248634	-0.300546	0.0466085		5	0.819672	0.877049	0.901639	0.86612	0.0420623
7.5	-0.0928959	-0.13388	-0.23224	-0.153005	0.0716139		7.5	0.92623	0.836066	0.852459	0.871585	0.0480284
10	-0.0846992	-0.15847	-0.150273	-0.131147	0.0404335		10	0.868852	0.852459	0.803279	0.84153	0.0341257
25	0.0300549	-0.00273197	-0.0191254	0.00273251	0.0250414		25	0.860656	0.92623	0.877049	0.887978	0.0341257
50	0.0136615	0.0136615	-0.0683057	-0.0136609	0.0473238		50	0.934426	0.967213	0.909836	0.937158	0.0287859

## Sheet: BRM1 Gly172His
[AG]10							[AG]10
AMP-PNP							AMP-PNP
DMSO							RocA
Protein concentration [μM]	Replicate 1	Replicate 2	Replicate 3	Mean	s.d.		Protein concentration [μM]	Replicate 1	Replicate 2	Replicate 3	Mean	s.d.
0.01	-0.101093	0.0628415	-0.142077	-0.0601093	0.108432		0.01	0.068306	0.142077	0.0601093	0.0901639	0.045144
0.025	-0.0601093	-0.0437158	-0.117486	-0.0737705	0.0387362		0.025	0.199454	0.215847	0.281421	0.23224	0.043373
0.05	0.0136612	-0.0191257	-0.068306	-0.0245902	0.0412559		0.05	0.592896	0.510929	0.478142	0.527322	0.0591074
0.075	0.00546448	0.0136612	-0.010929	0.00273224	0.0125207		0.075	0.551913	0.560109	0.560109	0.557377	0.00473238
0.1	0.0218579	0.0382514	0.0218579	0.0273224	0.00946476		0.1	0.60929	0.674863	0.551913	0.612022	0.0615209
0.25	0.0218579	0.0956284	-0.0273224	0.0300546	0.0618839		0.25	0.625683	0.781421	0.756831	0.721311	0.0837243
0.5	0.185792	0.0546448	0.0874317	0.10929	0.0682513		0.5	0.871585	0.806011	0.871585	0.849727	0.037859
0.75	0.169399	-0.0519126	0.0136612	0.0437158	0.113676		0.75	0.879781	0.863388	0.912568	0.885246	0.0250414
1	0.177596	0.153005	0.0956284	0.142077	0.0420623		1	0.953552	0.937158	0.871585	0.920765	0.043373
2.5	0.226776	0.0546448	0.120219	0.13388	0.0868749		2.5	0.928962	0.961749	0.945355	0.945355	0.0163934
5	0.718579	0.79235	0.653005	0.721311	0.0697123		5	0.937158	0.937158	0.904372	0.92623	0.0189295
7.5	0.784153	0.800546	0.751366	0.778689	0.0250414		7.5	0.871585	0.912568	0.904372	0.896175	0.0216865
10	0.989071	0.849727	0.710383	0.849727	0.139344		10	0.953552	0.928962	0.855191	0.912568	0.0511885
25	0.79235	0.857923	0.702186	0.784153	0.0781917		25	0.937158	1.02732	0.953552	0.972678	0.0480284
50	0.726776	0.710383	0.784153	0.740437	0.0387362		50	1.04372	1.04372	1.02732	1.03825	0.00946476

## Sheet: BRM1 WT Gly172
[AG]10							[AG]10
AMP-PNP							AMP-PNP
DMSO							RocA
Protein concentration [μM]	Replicate 1	Replicate 2	Replicate 3	Mean	s.d.		Protein concentration [μM]	Replicate 1	Replicate 2	Replicate 3	Mean	s.d.
0.01	-0.0464484	-0.0300549	-0.136612	-0.0710385	0.057377		0.01	-0.21858	-0.202186	-0.226776	-0.215847	0.0125207
0.025	-0.0546451	-0.0956287	-0.0546451	-0.0683063	0.0236619		0.025	-0.128416	-0.0710385	-0.0464484	-0.0819675	0.0420623
0.05	0.0355189	0.0273221	-0.144809	-0.0273227	0.101829		0.05	0.273224	-0.00546475	-0.226776	0.0136609	0.250548
0.075	-0.161202	-0.128416	0.00273197	-0.0956287	0.0867459		0.075	-0.112022	-0.0464484	-0.210383	-0.122951	0.0825119
0.1	-0.0464484	-0.0300549	-0.0628418	-0.0464484	0.0163934		0.1	0.322404	-0.193989	-0.161202	-0.0109292	0.28914
0.25	-0.251366	-0.29235	-0.26776	-0.270492	0.020628		0.25	0.166666	0.25683	0.18306	0.202186	0.0480284
0.5	-0.251366	-0.26776	-0.202186	-0.240437	0.0341257		0.5	0.289617	0.289617	0.289617	0.289617	0
0.75	-0.136612	-0.161202	-0.177596	-0.15847	0.020628		0.75	0.469945	0.273224	0.15847	0.300546	0.157525
1	-0.251366	-0.144809	-0.21858	-0.204918	0.0545765		1	0.461748	0.346994	0.330601	0.379781	0.0714574
2.5	0.0765025	0.0846992	-0.161202	-2.73224e-07	0.139665		2.5	0.461748	0.371584	0.387978	0.407104	0.0480284
5	0.240437	0.117486	0.265027	0.20765	0.0790463		5	0.568306	0.396175	0.428961	0.464481	0.0913974
7.5	0.28142	0.240437	0.166666	0.229508	0.0581524		7.5	0.576502	0.437158	0.404371	0.472677	0.0913974
10	0.15847	0.23224	0.20765	0.199453	0.0375621		10	0.437158	0.396175	0.322404	0.385246	0.0581524
25	0.371584	0.437158	0.306011	0.371584	0.0655738		25	0.65847	0.437158	0.461748	0.519125	0.1213
50	0.445355	0.469945	0.478142	0.464481	0.0170628		50	0.592896	0.486339	0.469945	0.516393	0.0667584
