# Supplementary material for: A parasitic fungus employs mutated eIF4A to survive on rocaglate-synthesizing Aglaia plants
Source: eLife journal article supplement (doi:10.7554/elife.81302), 2023-01-13
Supplement: fig3-data1 [file Figure 3A-source data 1.xlsx]

## Sheet: CAA repeats
H. sapiens WT Phe163							H. sapiens Phe163Gly
RocA [μM]	Replicate 1	Replicate 2	Replicate 3	Mean	s.d.		RocA [μM]	Replicate 1	Replicate 2	Replicate 3	Mean	s.d.
0	1	1	1	1	0		0	1	1	1	1	0
0.1	0.907484	1.71537	1.09535	1.2394	0.422767		0.1	0.887093	1.30061	0.992315	1.06001	0.214909
1	0.771483	1.70247	0.970929	1.14829	0.49018		1	0.808345	2.55135	0.900843	1.42018	0.980714
10	0.774255	1.31015	0.950143	1.01152	0.273169		10	0.62563	1.13109	0.997149	0.917955	0.261869

## Sheet: 7×AGAGAG
H. sapiens WT Phe163							H. sapiens Phe163Gly
RocA [μM]	Replicate 1	Replicate 2	Replicate 3	Mean	s.d.		RocA [μM]	Replicate 1	Replicate 2	Replicate 3	Mean	s.d.
0	1	1	1	1	0		0	1	1	1	1	0
0.1	0.758391	1.16667	0.57399	0.833016	0.303304		0.1	0.884906	1.67809	0.718244	1.09375	0.512869
1	0.358114	0.691952	0.356436	0.468834	0.193228		1	0.780663	1.55966	1.19796	1.17943	0.389828
10	0.206103	0.299501	0.223441	0.243015	0.0496808		10	0.639992	1.114	1.27023	1.00807	0.328199
