# Supplementary material for: A parasitic fungus employs mutated eIF4A to survive on rocaglate-synthesizing Aglaia plants
Source: eLife journal article supplement (doi:10.7554/elife.81302), 2023-01-13
Supplement: fig3-data2 [file Figure 3B-source data 1.xlsx]

## Sheet: Sheet1
H. sapiens WT Phe163							H. sapiens Phe163Gly
Pre-incubation	Replicate 1	Replicate 2	Replicate 3	Mean	s.d.		Condition	Replicate 1	Replicate 2	Replicate 3	Mean	s.d.
Protein +; RocA −	1.03546	0.956164	1.00838	1	0.0403043		Protein +; RocA −	0.903554	0.939098	1.15735	1	0.137421
Protein +; RocA +	1.3415	1.31346	1.17131	1.27542	0.0912452		Protein +; RocA +	0.384244	0.296259	0.469112	0.383205	0.0864316
Protein −; RocA −	1.026	1.10398	0.870024	1	0.119125		Protein −; RocA −	0.93499	0.980088	1.08492	1	0.0769231
Protein −; RocA +	1.08737	1.22385	1.17114	1.16079	0.0688238		Protein −; RocA +	0.969308	0.956353	1.05426	0.993308	0.0531843
