# Supplementary material for: A parasitic fungus employs mutated eIF4A to survive on rocaglate-synthesizing Aglaia plants
Source: eLife journal article supplement (doi:10.7554/elife.81302), 2023-01-13
Supplement: fig3-figsupp1-data2 [file Figure 3-figure supplement 1D-source data 1.xlsx]

## Sheet: Sheet1
Replicate	Naïve	eIF4AWT#1	eIF4AWT#2	eIF4AH153G#1	eIF4AH153G#2
1	19.76	20.1	19.74	19.54	18.7
2	18.72	19.44	18.81	19.63	19.88
3	19.51	18.42	19.25	20.44	19.3
4	20.01	19.53	19.58	20.26	19.79
5	20.01	20.31	18.95	19.38	19.49
