# Supplementary material for: A parasitic fungus employs mutated eIF4A to survive on rocaglate-synthesizing Aglaia plants
Source: eLife journal article supplement (doi:10.7554/elife.81302), 2023-01-13
Supplement: fig3-figsupp1-data3 [file Figure 3-figure supplement 1E-G-source data 1.xlsx]

## Sheet: BRM1 Gly172Phe
[AG]10							[AG]10
ADP + Pi							ADP + Pi
DMSO							Aglafoline
Protein concentration [μM]	Replicate 1	Replicate 2	Replicate 3	Mean	s.d.		Protein concentration [μM]	Replicate 1	Replicate 2	Replicate 3	Mean	s.d.
0.01	0.0355189	0.0109287	-0.169399	-0.0409839	0.111888		0.01	0.114754	0.00819672	0.0409836	0.0546448	0.0545765
0.025	-0.136612	-0.0218582	-0.275957	-0.144809	0.127247		0.025	0.106557	0.0901639	0.180328	0.125683	0.0480284
0.05	-0.202186	-0.234973	-0.29235	-0.24317	0.0456374		0.05	0.286885	0.286885	0.327869	0.300546	0.0236619
0.075	-0.0382516	-0.120219	-0.0956287	-0.0846997	0.0420623		0.075	0.368852	0.327869	0.286885	0.327869	0.0409836
0.1	0.0765025	-0.177596	-0.120219	-0.0737708	0.133265		0.1	0.516393	0.311475	0.278689	0.368852	0.128822
0.25	-0.530055	-0.439891	-0.431694	-0.467213	0.0545765		0.25	0.557377	0.606557	0.663934	0.60929	0.0533312
0.5	-0.710383	-0.603825	-0.546448	-0.620219	0.0831876		0.5	0.92623	0.942623	0.819672	0.896175	0.0667584
0.75	-0.579235	-0.546448	-0.571039	-0.565574	0.0170628		0.75	0.95082	0.844262	0.893443	0.896175	0.0533312
1	-0.579235	-0.587432	-0.612022	-0.592896	0.0170628		1	0.786885	0.877049	0.762295	0.808743	0.060419
2.5	-0.579235	-0.677596	-0.603825	-0.620219	0.0511885		2.5	0.844262	0.786885	0.868852	0.833333	0.0420623
5	-0.587432	-0.644809	-0.751366	-0.661202	0.0831876		5	0.901639	0.942623	0.885246	0.909836	0.0295537
7.5	-0.644809	-0.595629	-0.628416	-0.622951	0.0250414		7.5	0.893443	1.01639	0.934426	0.948087	0.0626035
10	-0.71858	-0.685793	-0.587432	-0.663935	0.0682513		10	1.05738	0.893443	0.877049	0.942623	0.0997174
25	-0.79235	-0.595629	-0.538252	-0.642077	0.133265		25	0.885246	1.03279	1.05738	0.991803	0.0930969

## Sheet: BRM1 Gly172His
[AG]10							[AG]10
ADP + Pi							ADP + Pi
DMSO							Aglafoline
Protein concentration [μM]	Replicate 1	Replicate 2	Replicate 3	Mean	s.d.		Protein concentration [μM]	Replicate 1	Replicate 2	Replicate 3	Mean	s.d.
0.01	0.131148	0.0901639	0.0327869	0.0846995	0.0494075		0.01	-0.0382514	0.0437158	0.0437158	0.0163934	0.0473238
0.025	0.163934	0.00819672	0.00819672	0.0601093	0.0899152		0.025	0.0273224	0.0355191	0.010929	0.0245902	0.0125207
0.05	0.213115	0.0327869	0.131148	0.125683	0.090288		0.05	0.0437158	0.101093	0.0765027	0.0737705	0.0287859
0.075	0.196721	0.180328	0.139344	0.172131	0.0295537		0.075	0.0846995	0.0601093	0.0355191	0.0601093	0.0245902
0.1	0.172131	0.163934	0.139344	0.15847	0.0170628		0.1	0.0846995	0.0601093	0.068306	0.0710383	0.0125207
0.25	0.0409836	0.0655738	0.0737705	0.0601093	0.0170628		0.25	0.18306	0.166667	0.0601093	0.136612	0.0667584
0.5	0.213115	0.204918	0.221311	0.213115	0.00819672		0.5	0.338798	0.428962	0.363388	0.377049	0.0466085
0.75	0.0901639	0.0901639	0.114754	0.0983607	0.0141971		0.75	0.519126	0.437158	0.428962	0.461749	0.0498587
1	0.122951	0.0983607	0.114754	0.112022	0.0125207		1	0.576503	0.715847	0.584699	0.625683	0.0781917
2.5	0.0901639	0.00819672	0.139344	0.079235	0.0662533		2.5	0.781421	0.73224	0.806011	0.773224	0.0375621
5	0.172131	0.188525	0.114754	0.15847	0.0387362		5	1.01093	0.920765	0.887978	0.939891	0.0636677
7.5	0.139344	0.213115	0.131148	0.161202	0.045144		7.5	1.01913	0.937158	0.969945	0.97541	0.0412559
10	0.229508	0.122951	0.204918	0.185792	0.0557939		10	1.12568	1.06011	1.02732	1.07104	0.0500828
25	0.278689	0.254098	0.229508	0.254098	0.0245902		25	1.20765	1.16667	1.15027	1.17486	0.0295537
50	0.377049	0.311475	0.311475	0.333333	0.037859		50	1.19126	1.30601	1.25683	1.25137	0.0575719

## Sheet: BRM1 WT Gly172
[AG]10							[AG]10
ADP + Pi							ADP + Pi
DMSO							Aglafoline
Protein concentration [μM]	Replicate 1	Replicate 2	Replicate 3	Mean	s.d.		Protein concentration [μM]	Replicate 1	Replicate 2	Replicate 3	Mean	s.d.
0.01	0.0491803	0.0983607	-0.106557	0.0136612	0.106977		0.01	0.0245902	0.0409836	0.00819672	0.0245902	0.0163934
0.025	0.122951	0.0491803	-0.155738	0.00546448	0.144396		0.025	-0.0163934	-0.00819672	-0.0491803	-0.0245902	0.0216865
0.05	0.0983607	0.237705	0.0819672	0.139344	0.0855763		0.05	0.0327869	-0.00819672	-0.0737705	-0.0163934	0.0537495
0.075	0.336066	0.213115	0.196721	0.248634	0.0761604		0.075	-0.0491803	-0.0327869	0.0163934	-0.0218579	0.0341257
0.1	-0.172131	-0.0901639	-0.00819672	-0.0901639	0.0819672		0.1	-0.0245902	-0.0409836	-0.057377	-0.0409836	0.0163934
0.25	-0.311475	-0.303279	-0.270492	-0.295082	0.0216865		0.25	-0.00819672	-0.106557	-0.0655738	-0.0601093	0.0494075
0.5	-0.270492	-0.163934	-0.344262	-0.259563	0.0906593		0.5	0.155738	-0.106557	0.0163934	0.0218579	0.131233
0.75	-0.360656	-0.377049	-0.385246	-0.374317	0.0125207		0.75	0.196721	0.0327869	0.172131	0.13388	0.0884081
1	-0.352459	-0.483607	-0.459016	-0.431694	0.0697123		1	0.0983607	0.0655738	0.155738	0.106557	0.0456374
2.5	-0.368852	-0.360656	-0.344262	-0.357923	0.0125207		2.5	0.344262	0.245902	0.418033	0.336066	0.0863578
5	-0.459016	-0.368852	-0.393443	-0.407104	0.0466085		5	0.581967	0.680328	0.590164	0.617486	0.0545765
7.5	-0.377049	-0.368852	-0.459016	-0.401639	0.0498587		7.5	0.590164	0.631148	0.754098	0.65847	0.0853142
10	-0.368852	-0.45082	-0.221311	-0.346995	0.116305		10	0.655738	0.704918	0.713115	0.691257	0.0310323
25	-0.303279	-0.377049	-0.139344	-0.273224	0.121669		25	0.778689	0.827869	0.877049	0.827869	0.0491803
