# Supplementary material for: A parasitic fungus employs mutated eIF4A to survive on rocaglate-synthesizing Aglaia plants
Source: eLife. 2023 Feb 28;12:e81302. doi: 10.7554/eLife.81302 (PMC9977294; doi:10.7554/eLife.81302)
Supplement: Supplementary file 1. — Summary of de novo-assembled transcripts and genes from Aglaia-infecting fungus RNA-Seq. [file elife-81302-supp1.xlsx]

## Sheet: Sheet2
	Genes	Transcripts
Total	784518	990701
Protein-coding	27471	76493
DEAD/DEAH-containing	61	296
