# Supplementary material for: A parasitic fungus employs mutated eIF4A to survive on rocaglate-synthesizing Aglaia plants
Source: eLife. 2023 Feb 28;12:e81302. doi: 10.7554/eLife.81302 (PMC9977294; doi:10.7554/eLife.81302)
Supplement: Supplementary file 2. — Nucleotide sequence accessions are listed with subject strain, description, NCBI taxonomy ID, subject accession, and alignment statistics to Aglaia-infecting fungus ITS (percent identity, alignment length, mismatch numbers, gap opens, subject start, subject end, E-value, and bit score). [file elife-81302-supp2.xlsx]

## Sheet: Sheet2
#	Subject strain	Description	NCBI taxonomy ID	Subject accession	Percent identity	Alignment length	Mismatches	Gap opens	Subject start	Subject end	E-value	Bit score
1	Ophiocordyceps sp.	Unclassified Ophiocordyceps	1912256	KY924813.1	98.936	376	3	1	205	580	0	671
2	Ophiocordyceps sp.	Unclassified Ophiocordyceps	1912256	KY924812.1	98.936	376	3	1	206	581	0	671
3	Ophiocordyceps sp.	Unclassified Ophiocordyceps	1912256	KY924808.1	98.936	376	3	1	206	581	0	671
4	Ophiocordyceps sp. strain S17709	Unclassified Ophiocordyceps	1912256	MW380765.1	98.936	376	3	1	14	389	0	671
5	Ophiocordyceps sp. strain S17401	Unclassified Ophiocordyceps	1912256	MW380760.1	98.936	376	3	1	14	389	0	671
6	Ophiocordyceps sp. strain S17230	Unclassified Ophiocordyceps	1912256	MW380759.1	98.936	376	3	1	14	389	0	671
7	Ophiocordyceps sp.	Unclassified Ophiocordyceps	1912256	KY924807.1	98.67	376	4	1	201	576	0	665
8	Ophiocordyceps sp. strain S17189	Unclassified Ophiocordyceps	1912256	MW380756.1	98.404	376	5	1	14	389	0	660
9	Ophiocordyceps sp. strain S172	Unclassified Ophiocordyceps	1912256	MW380751.1	98.404	376	5	1	14	389	0	660
10	Ophiocordyceps sp.	Unclassified Ophiocordyceps	1912256	KY924809.1	98.143	377	5	2	203	579	0	656
11	Ophiocordyceps sp. strain S1826	Unclassified Ophiocordyceps	1912256	MW380772.1	98.143	377	5	2	14	390	0	656
12	Ophiocordyceps sp. strain S17243	Unclassified Ophiocordyceps	1912256	MW380771.1	98.143	377	5	2	14	390	0	656
13	Ophiocordyceps sp. strain S17152	Unclassified Ophiocordyceps	1912256	MW380757.1	98.143	377	5	1	14	390	0	656
14	Ophiocordyceps sp. strain S1811	Unclassified Ophiocordyceps	1912256	MW380769.1	97.619	378	6	2	14	391	0	645
15	Ophiocordyceps sp. strain S17670	Unclassified Ophiocordyceps	1912256	MW380754.1	97.105	380	6	4	14	393	4.24e-178	636
16	Ophiocordyceps sp. strain S17809	Unclassified Ophiocordyceps	1912256	MW380752.1	96.325	381	8	6	14	394	1.19e-173	621
17	Ophiocordyceps sp. strain S17819	Unclassified Ophiocordyceps	1912256	MW380758.1	96.296	378	11	1	14	391	1.54e-172	617
18	Ophiocordyceps sp. strain S17795	Unclassified Ophiocordyceps	1912256	MW380761.1	96.011	376	14	1	14	389	2.57e-170	610
19	Ophiocordyceps sp. strain S17799	Unclassified Ophiocordyceps	1912256	MW380766.1	95.349	387	4	4	14	400	4.3e-168	603
20	Ophiocordyceps sp. strain S17757	Unclassified Ophiocordyceps	1912256	MW380762.1	95.065	385	9	4	14	398	2e-166	597
21	Ophiocordyceps sp.	Unclassified Ophiocordyceps	1912256	KY924811.1	95.238	378	13	5	202	577	2.59e-165	593
22	Ophiocordyceps sp.	Unclassified Ophiocordyceps	1912256	KY924810.1	95.238	378	13	5	205	580	2.59e-165	593
23	Ophiocordyceps sp. strain S17387	Unclassified Ophiocordyceps	1912256	MW380770.1	95.238	378	13	5	14	389	2.59e-165	593
24	Ophiocordyceps sp. strain S1843	Unclassified Ophiocordyceps	1912256	MW380768.1	95.238	378	13	5	14	389	2.59e-165	593
25	Ophiocordyceps coccidiicola	-	102624	AB031196.1	95.238	378	13	5	32	407	2.59e-165	593
26	Ophiocordyceps sp. strain S17201	Unclassified Ophiocordyceps	1912256	MW380767.1	94.974	378	14	5	14	389	1.2e-163	588
27	Ophiocordyceps sp. strain S17750	Unclassified Ophiocordyceps	1912256	MW380763.1	94.974	378	14	5	14	389	1.2e-163	588
28	Hirsutella rhossiliensis	-	111463	AB109760.1	93.617	376	16	6	1881	2249	1.22e-153	555
29	Ophiocordyceps sp. strain S189	Unclassified Ophiocordyceps	1912256	MW380764.1	91.582	392	13	11	14	402	3.45e-144	523
30	Ophiocordyceps rubiginosiperithecia	-	1126811	AB294423.1	91.467	375	19	9	1946	2307	4.49e-138	503
