# Supplementary material for: A parasitic fungus employs mutated eIF4A to survive on rocaglate-synthesizing Aglaia plants
Source: eLife. 2023 Feb 28;12:e81302. doi: 10.7554/eLife.81302 (PMC9977294; doi:10.7554/eLife.81302)
Supplement: Supplementary file 3. — Fungal species are listed with host species, strain names, GenBank IDs (ITS, SSU, LSU, TEF1α, and RPB1), and references. The DNA sequences shown in the columns are the best hits from the nucleotide collection searched by BLASTn. [file elife-81302-supp3.xlsx]

## Sheet: Table S1
Species	Host class	Host order	Strain	ITS	LSU	SSU	TEF1α	RPB1	References
Ophiocordyceps australis	Insecta	Hymenoptera	Ophaus992	–	KC610766	KC610785	KC610731	KF658663	Ban et al. 2015
Ophiocordyceps coccidiicola	Insecta	Hemiptera	NBRC 100682	–	AB968419	AB968404	AB968583	–	Ban et al. 2015
Ophiocordyceps coenomyia	Insecta	Diptera	NBRC 108993	AB968396	AB968412	AB968384	AB968570	–	Ban et al. 2015
Ophiocordyceps arborescens	Insecta	Hemiptera	NBRC 105891	AB968398	AB968414	–	AB968572	–	Ban et al. 2015
Ophiocordyceps macroacicularis	Insecta	Lepidoptera	NBRC 105888	AB968401	AB968417	AB968389	AB968575	–	Ban et al. 2015
Ophiocordyceps sobolifera	Insecta	Hemiptera	NBRC 106967	AB968409	AB968422	AB968395	AB968590	–	Ban et al. 2015
Ophiocordyceps tricentri	Insecta	Hemiptera	NBRC 106968	AB968410	AB968423	AB968393	AB968593	–	Ban et al. 2015
Ophiocordyceps appendiculata	Insecta	Coleoptera	NBRC 106960	JN943326	JN941413	JN941728	AB968577	JN992462	Ban et al. 2015
Ophiocordyceps rubiginosiperitheciata	Insecta	Coleoptera	NBRC 106966	JN943344	JN941437	JN941704	AB968582	JN992438	Ban et al. 2015
Ophiocordyceps sphecocephala	Insecta	Hymenoptera	NBRC 101753	JN943350	JN941446	JN941695	AB968592	JN992429	Ban et al. 2015
Ophiocordyceps australis sensu lato	Insecta	Hymenoptera	OphauB2	–	>Ophiocordyceps_australis_sensu_lato_from_Brazil_OphauB2_ ------------------------------------------------------------ -----------------------------------------ccgagttgtaatttgcaga ggatgcttttgacatggtaccttccgagttccctggaacgggacgccatagagggtgaga gccccgtctagttggatacctggtctctataaagctccttcgacgagtcgagtagtttgg gaatgctgctcaaagtgggaggtatatgtcttctaaagctaaatactggccagagaccga tagcgcacaagtagagtgatcgaaagatgaaaagca…	>Ophiocordyceps_australis_sensu_lato_from_Brazil_OphauB2_ ttatcgtttatttgatagtgccttactacttggataaccgtggtaattctagagctaata catgctaaaagacccgactttggaagggttgtatttattagattaaaaaccaatgccctc tgggctcactggtgaatcatgataacttcgcgaatcgcatggccttgtgccggcgatggc tcattcaaatttcttccctatcaactttcgatgtttgggtagtggccaaacatggttgca acgggtaacggagggttagggctcgaccccggagaaggagcctgagaaacggctactaca tccaaggaaggcagcaggcgcgcaaattacccaatc…	>Ophiocordyceps_australis_sensu_lato_from_Brazil_OphauB2_ ATCAAGAACATGATCACTGGTACCTCCCAGGCCGACTGCGCCATTCTCATCATCGCTGCC GGCACTGGTGAGTTTGAGGCTGGTATCTCCAAGGATGGCCAGACTCGTGAGCATGCTCTG CTCGCCTACACCCTGGGTGTTAAACAGCTTATTGTCGCCATCAACAAGATGGACACCACC AAGTGGTCCGAGGCCCGTTACCAGGAAATCATCAAGGAGACGTCCAACTTCATCAAGAAG GTCGGCTACAACCCCAAGACGGTTCCTTTTGTCCCCATTTCTGGCTTCAATGGCGACAAC ATGCTCGCCCCCTCAACCAACTGCCCCTGGTACAAG…	>Ophiocordyceps_australis_sensu_lato_from_Brazil_OphauB2_ TGCCATAACTGCAGCAAGGTGTTGGCCGATACTGTTAGTTGATGCAACATTCTTCAAGGT TATTCTCATGACTTTGTTGATTGCTGACTCGCTAACGCAGAGCGATCCTGACTTTGCCGC TGCCATCAAGACGCGGGACCCCAAGGTTCGCTTCAACCGTGTTTGGAATGTGTGCAAGAA AAAGCGCAGATGCGAAAACGAGGATCGCCAGAACAAGGACAAGGACGATGACTTCATGCC TGGAATGAAGCAGTTGCAGACTGTCGATAACCACGGTGGCTGCGGCAACGTTCAGCCTGC TGTCCGTCAGCTTGCCTTGCAGCTCAAGGCCGCCTT…	de Bekker et al. 2017
Ophiocordyceps australis sensu lato	Insecta	Hymenoptera	OphauG2	–	>Ophiocordyceps_australis_sensu_lato_from_Ghana_OphauG2_ CCGAGTTGTAATTTGCAGAGGATGCTTTTGGCATGGTACCTTCCGAGTTCCCTGGAACGG GACGCCATAGAGGGTGAGAGCCCCGTCTAGTTGGATACCTAAGCCTCTATAAAGCTCCTT CGACGAGTCGAGTAGTTTGGGAATGCTGCTCAAAGCGGGAGGTATATGTCTTCTAAAGCT AAATATTGGCCAGAGACCGATAGCGCACAAGTAGAGTGATCGAAAGATGAAAAGCACTTT GAAAAGAGGGTTAAATAGTACGTGAAATTGCTGAAAGGGAAGCGCTTATAACTAGACATG GAGATTTTCAATCACCTAGTATTTTTACTAGGGTACT…	>Ophiocordyceps_australis_sensu_lato_from_Ghana_OphauG2_ ttatcgtttatttgatagtgctttactacttggataaccgtggtaattctagagctaata catgctaaaagacccgactttggaagggttgtatttattagattaaaaaccaatgccctc tgggctcactggtgaatcatgataacttcgcgaatcgcatggccttgtgccggcgatggc tcattcaaatttcttccctatcaactttcgatgtttgggtagtggccaaacatggttgca acgggtaacggagggttagggctcgaccccggagaaggagcctgagaaacggctactaca tccaaggaaggcagcaggcgcgcaaattacccaatcc…	>Ophiocordyceps_australis_sensu_lato_from_Ghana_OphauG2_ ATCAAGAACATGATTACTGGTACCTCCCAGGCTGACTGCGCCATTCTCATCATCGCTGCC GGCACTGGTGAATTCGAGGCTGGTATCTCCAAGGATGGCCAGACTCGTGAGCACGCTCTG CTCGCCTACACCCTGGGTGTCAAGCAGCTTATTGTTGCCATCAACAAGATGGACACCACC AAGTGGTCCGAGGCTCGCTACCAGGAAATCATCAAGGAGACGTCCAACTTCATCAAGAAG GTCGGCTACAACCCCAAGACGGTTCCTTTTGTTCCCATCTCTGGCTTCAATGGTGACAAC ATGCTCTCCGCCTCTGCCAACTGCCCCTGGTACAAGG…	>Ophiocordyceps_australis_sensu_lato_from_Ghana_OphauG2_ TGCCATAACTGCAGCAAGGTGTTGGCCGATACTGTTAGTTGATGCAACATTCTTCAAGGT TATTCTCATGACTTTGTTGATTGCTGACTCGCAAACGCAGAGCGATCCTGACTTTGCCGC TGCCATCAAGACGCGGGACCCCAAGGTTCGCTTCAACCGCGTTTGGAACGTGTGCAAGAA GAAGCGGAGATGCGAAAATGAGGACCGGCAGAACAAGGACAAGGACGACGACTTTATGCC TGGAATCAAGCAGCTGCAGACTGTCGACAACCACGGTGGCTGCGGCAACGTTCAGCCTGC TGTCCGTCAGCTTGCCTTGCAGCTCAAGGCTGCCTTT…	de Bekker et al. 2017
Ophiocordyceps kimflemingae	Insecta	Hymenoptera	Ophio5	–	>Ophiocordyceps_kimflemingae_Ophio5_ GGCGCCCGAGTTGTAATCTGCAGAGGATGCTTCTGGCGGGGCGCCTTCCGAGTTCCCTGG AACGGGACGCCGCAGAGGGTGAGAGCCCCGTACGGTCGGACGCCGAGCCTGTGTGAAGCT CCTTCGGCGAGTCGAGTAGTTTGGGAATGCTGCTCAAAACGGGAGGTATACGCCTTCTAA AGCTAAATACCGGCCAGAGACCGATAGCGCACAAGTAGAGTGATCGAAAGATGAAAAGCA CTTTGAAAAGAGGGTTAAACAGTACGTGAAATTGTTGAAAGGGAAGCGCTCGCGGCCAGA CTCGGGCCCGGGGGATCATCCGGCGCTCGCGCCGGTGCACTCCGCCGGGCTCCGGGC…	>Ophiocordyceps_kimflemingae_Ophio5_ ttatcgtttatttgatagcaccttgctacttgggtaaccgtggtaattctagagctaata catgccaaaaatcccgacttcggaagggatgtgtttattagattcaaaaccaatgccccc tgggctcactggtgattcatgataaccgctcgaatcgcacggccttgcgctggcgatggt tcattcaaatttcttccctatcaactttcgatgtttgggtagtggccaaacatggttgca acgggtaacggagggttagggctcgaccccggagaaggagcctgagaaacggctactaca tccaaggaaggcagcaggcgcgcaaattacccaatcccgacacggggaggtagtgac…	>Ophiocordyceps_kimflemingae_Ophio5_ ATCAAGAACATGATCACTGGCACTTCACAGGCCGACTGCGCCATTCTCATCATTGCCGCC GGCACTGGTGAGTTCGAGGCTGGTATCTCCAAGGATGGCCAGACCCGAGAGCACGCCCTG CTCGCCTACACCTTGGGTGTGAAGCAGCTCATCGTCGCCATCAACAAGATGGACACCACC AAGTGGTCTGAGGCTCGTTTCCAGGAAATCATCAAGGAGACGTCCAACTTCATCAAGAAA GTCGGCTACAACCCCAAGACGGTTCCCTTCGTCCCCATCTCCGGGTTCAACGGCGACAAC ATGCTCACTGCCTCCTCCAACTGCCCCTGGTACAAGGGCTGGGAGAAGGAGACCAAG…	>Ophiocordyceps_kimflemingae_Ophio5_ TGCCATAACTGCAGCAAGGTGTTGGCCGATACTGTTAGTCTATGCTACTCTCTTCAAGGT TTGTTTGTCGCTTGATGATTGCTGACGCTTTGCCTTTTTACAGAGCGATCCCGAGTTCGT CGCCGCCATCAACACCAGAGACCCCAAGTCACGTTTCAACCGCGTCTGGACCGTCTGCAA GAAGAAGAGGAGATGCGAGAACGAAGACCGCCAGAACAAGGACAAGGAAGAGGAGTTTGC GCCGGGCCTGAAGCAGCCTCTCGCCGTCGAGAACCACGGCGGCTGCGGCAATGTCCAGCC CGCCGTGCGGCAGGCGGCCCTGCAACTCAAGGCGGCCTTCGAAGTCGTTCAGGAGGA…	de Bekker et al. 2017
Ophiocordyceps subramaniannii sensu lato	Insecta	Hymenoptera	Hirsu2	–	>Ophiocordyceps_subramaniannii_sensu_lato_Hirsu2_ GGGGCCCGAGTTGTAATTTGCAGAGGATGCTTTTGGCGCGGCGCCTTCCGAGTTCCCTGG AACGGGACGCCATAGAGGGTGAGAGCCCCGTCTGGTCGGACGCCTAGCCTCTGTAAAGCT CCTTCGACGAGTCGAGTAGTTTGGGAATGCTGCTCAAAATGGGAGGTATATGTCTTCTAA AGCTAAATACCGGCCAGAGACCGATAGCGCACAAGTAGAGTGATCGAAAGATGAAAAGCA CTTTGAAAAGAGAGTTAAACAGCACGTGAAATTGTTGAAAGGGAAGCGCTCGTGGCCAGA CTTGGGCGCGGTGAATCATCCGGCGGTCCCCGCCGGTGCACTTC…	>Ophiocordyceps_subramaniannii_sensu_lato_Hirsu2_ ttatcgtttatttgatagtaccttactacttggataaccgtggtaattctagagctaata catgctgaaaatcccgacttacggagggatgtatttattagattaaaaaccaatgccctc tgggctctctggtgattcatgataacttctcgaatcgcacggccttgcgccggcgatggt tcattcaaatttcttccctatcaactttcgatgtttgggtagtggccaaacatggttgca acgggtaacggagggttagggctcgaccccggagaaggagcctgagaaacggctactaca tccaaggaaggcagcaggcgcgcaaattacccaatcccgacacg…	>Ophiocordyceps_subramaniannii_sensu_lato_Hirsu2_ ATCAAGAACATGATCACTGGTACCTCCCAGGCCGACTGCGCTATCCTCATCATCGCCGCC GGCACTGGTGAGTTCGAGGCTGGTATCTCCAAGGATGGCCAGACTCGTGAGCACGCTCTG CTCGCCTACACCCTGGGTGTCAAGCAGCTCATCGTCGCCATCAACAAGATGGACACGACC CAGTGGTCCGAGGCCCGTTTCCAGGAAATCATCAAGGAGACGTCCAACTTCATCAAGAAG GTTGGCTACAACCCCAAGACGGTCCCCTTCGTCCCCATCTCCGGCTTCCACGGCGACAAC ATGTTGGCCGCCTCTGCCAACTGCCCCTGGTACAAGGGCTGGGA…	>Ophiocordyceps_subramaniannii_sensu_lato_Hirsu2_ TGCCATAACTGCAGCAAGGTGTTGGCCGATACTGTTCGTCTACGCTGCGCTCTTCAAGAT TCTTTGGTGACTTTCTGGGTGCTGACCTGATGTTCCTGCAGAGTGACCCCGAGTTCGTCA CTGCCATCAACACCAGGGACCCCAAGCTTCGCTTCAACCGCGTCTGGACGGTTTGCAAGA AGAAGAGGAGATGCGAGAACGAGGACCGTCAAAGCAAGGATAAGGATGAGGAGTTCGCGC CCGGCATGAAACTGCCCAACGCCGTCGACAACCACGGCGGCTGCGGCAACGTTCAGCCCG CCGTCCGGCAGGCCGCGCTGCAGCTCAAGGCGGCCTTCGAAGTC…	de Bekker et al. 2017
Ophiocordyceps heteropoda	Insecta	Hemiptera	OSC 106404	–	AY489722	AY489690	AY489617	AY489651	Castlebury et al. 2004
Ophiocordyceps lanpingensis	Insecta	Lepidoptera	YHOS0707	–	KC417461	KC417459	KC417463	KC417465	Chen et al. 2013
Ophiocordyceps sinensis	Insecta	Lepidoptera	GCA_000448365	–	>Ophiocordyceps_sinensis_CO18_GCA_000448365_ GGGCCCGAGTTGTAATTTGCAGAGGATGCTTTTGGCGCGGCGCCTTCCGAGTGCCCTGGA ACGGGACGCCATAGAGGGTGAGAGCCCCGTCTGGTCGGACGCCCAGCCTCTGTAAAGCTC CTTCGACGAGTCGAGTAGTTTGGGAATGCTGCTCTAAACGGGAGGTATATGTCTTCTAAA GCTAAATACCGGCCAGAGACCGATAGCGCACAAGTAGAGTGATCGAAAGATGAAAAGCAC TTTGAAAAGAGGGTTAAACAGTACGTGAAATTGTTGAAAGGGAAGCGCTTGTGACCAGAC TCGGGCGCGGCGAATCACCCGGCGTTCTCGCCGGTGCACTTCGACGCGC…	>Ophiocordyceps_sinensis_CO18_GCA_000448365_ ttatcgtttatttgatagtaccttactacttggataaccgtggtaattctagagctaata catgctgaaaatcccgactccggaagggatgtatttattagattcaaagccaatgccctc cgggctcactggtgattcatgataactcctcgaatcgcacggccttgcgccggcgatggt tcattcaaatttcttccctatcaactttcgatgtttgggtagtggccaaacatggttgca acgggtaacggagggttagggctcgaccccggagaaggagcctgagaaacggctactaca tccaaggaaggcagcaggcgcgcaaatt	>Ophiocordyceps_sinensis_CO18_GCA_000448365_ ATCAAGAACATGATCACCGGTACCTCCCAGGCCGATTGCGCTGTCCTTATCATCGCTGCC GGTACTGGTGAGTTCGAGGCTGGTATCTCCAAGGATGGCCAGACTCGTGAGCACGCCCTG CTTGCCTACACCCTCGGTGTGAAGCAGCTCATCGTTGCTATCAACAAGATGGACACCACC AAGTGGTCCGAGGCTCGCTTCCAGGAAATCATCAAGGAGACGTCCAACTTCATCAAGAAG GTCGGCTACAACCCCAAGACCGTCGCCTTTGTCCCCATCTCTGGCTTCAACGGCGACAAC ATGATTGATTCCTCCCCCAACTGCCCCTGGTACAAGGGCTGGGAGAAGG…	>Ophiocordyceps_sinensis_CO18_GCA_000448365_ TGCCATAACTGCAGCAAGGTGTTGGCCGATACTGTTAGTTTATGCTACTCTCTTCAAGAT TCTTTGGTGCCCTACTGGATGCTGACCTGCTGCTTCTATAGAGCGACCCTGAGTTTGTCG CTGCTATCAATACCCGAGATCCCAAGCTTCGCTTTAACCGCGTCTGGACCGTTTGCAAGA AGAAGAAGAGATGTGAAAACGAGGATCGCCAGAACAAGGACAAGGACGATGAGTTCGCAG CCGGGTTGAAGGCCGGCCTCGGCCTCGAGAATCACGGCGGTTGTGGCAATGTCCAGCCCG CCGTGCGTCACGCTGCCTTGCAGCTCAAGGCTGCCTACGAGGTGGTCCA…	Hu et al. 2013
Ophiocordyceps agriotidis	Insecta	Coleoptera	ARSEF 5692	JN049819	DQ518754	DQ522540	DQ522322	DQ522368	Kepler et al. 2012
Tolypocladium inflatum	Insecta	Coleoptera	OSC 71235	JN049844	EF469077	EF469124	EF469061	EF469090	Kepler et al. 2012
Ophiocordyceps gracilis	Insecta	Lepidoptera	EFCC 8572	JN049851	EF468811	EF468956	EF468751	EF468859	Kepler et al. 2012
Ophiocordyceps emeiensis	Insecta	Lepidoptera	G96031	AJ309347	–	–	–	–	Liu et al. 2002
Ophiocordyceps barnesii	Insecta	Coleoptera	BCC28560	–	–	EU408776	–	EU408773	Luangsa-Ard et al. 2010
Ophiocordyceps myrmecophila	Insecta	Hymenoptera	MY185	GU723760	–	–	GU797133	–	Luangsa-Ard et al. 2011
Ophiocordyceps curculionum	Insecta	Coleoptera	OSC 151910	–	KJ878885	KJ878918	–	KJ878999	Quandt et al. 2014
Ophiocordyceps dipterigena	Insecta	Diptera	OSC 151912	–	KJ878887	KJ878920	KJ878967	KJ879001	Quandt et al. 2014
Ophiocordyceps forquignonii	Insecta	Diptera	OSC 151908	–	KJ878889	KJ878922	–	KJ879003	Quandt et al. 2014
Ophiocordyceps lloydii	Insecta	Hymenoptera	OSC 151913	–	KJ878891	KJ878924	KJ878970	KJ879004	Quandt et al. 2014
Ophiocordyceps yakusimensis	Insecta	Hemiptera	HMAS 199604	–	KJ878902	KJ878938	–	KJ879018	Quandt et al. 2014
Tolypocladium capitatum	-	-	CGA_002901185	–	>CGA_002901185_LSU_NODE_78_length_6879_cov_928.051880_selection GGGCCCGAGTTGTAATTTGCAGAGGATGCTTTTGGCGCGGCGCCTTCCGAGTGCCCTGGA ACGGGACGCCATAGAGGGTGAGAGCCCCGTCTGGTCGGACGCCAAGCCAGTGTAAAGCTC CTTCGACGAGTCGAGTAGTTTGGGAATGCTGCTCTAAATGGGAGGTATATGTCTTCTAAA GCTAAATACCGGCCAGAGACCGATAGCGCACAAGTAGAGTGATCGAAAGATGAAAAGCAC TTTGAAAAGAGGGTTAAACAGTACGTGAAATTGTTGAAAGGGAAGCGCTCGTGACCAGAC TTGGGCCCGGTGAATCATCCAGCGTTCTCG…	>CGA_002901185_SSU_NODE_78_length_6879_cov_928.051880_selection TCATATGCTTGTCTCAAAGATTAAGCCATGCATGTCTAAGTATAAGCAATTATACGGCGA AACTGCGAATGGCTCATTATATAAGTTATCGTTTATTTGATAGCACCTTACTACTTGGAT AACCGTGGTAATTCTAGAGCTAATACATGCTAAAAATCCCGACTTCGGAAGGGATGTATT TATTAGATTAAAAACCAATGCCCCCCGGGGCTCTCTGGTGATTCATGATAACTTCGCGAA TCGCATGGCCTTGCGCCGGCGATGGCTCATTCAAATTTCTTCCCTATCAACTTTCGATGT TTGGGTAGTGGCCAAACATGGTTGCAACGG…	>CGA_002901185_TEF1a_NODE_40_length_22818_cov_88.933212_selection ATCAAGAACATGATCACTGGCACCTCCCAGGCCGACTGCGCTATCCTGATTATCGCTGCC GGCACTGGTGAGTTCGAGGCTGGTATCTCCAAGGATGGCCAGACCCGTGAGCACGCTCTG CTCGCCTACACCCTGGGTGTCAAGCAGCTCATCGTCGCCATCAACAAGATGGACACCACC AAGTGGTCCGAGGCCCGTTTCCAGGAGATCATCAAGGAGACCTCCAACTTCATCAAGAAG GTCGGCTACAACCCCAAGACGGTTGCCTTCGTCCCCATCTCCGGCTTCAACGGCGACAAC ATGCTCGAGGCCTCCCCCAACTGCCCCT…	>CGA_002901185_RPB1_NODE_343_length_36975_cov_96.403107_selection TGCCATAACTGCAGCAAGGTGTTGTCCGATACTGTTAGTCTATGCTGCTTTCTTGCGAGG GTTTGACCTTCGTATGATGCTGACCCGACTTTACGCAGAGCGACCCCGAGTTTGTCGCTG CCATCAACACACGGGACCCCAAGCTTCGCTTCAACCGTGTCTGGTCCGTCTGCAAGAAGA AGCGCAAGTGTGAGAACGAGGATCGCCAGAAAAAGGACGATGACGATTTCATACCGGGAA TGAAGTCTCATAACTGCAACAACCACGGTGGTTGTGGCAACTTGCAGCCCTTGGTGCGAC AGGCTGCGCTGCAACTCAAGGCTGCCTT…	Quandt et al. 2018
Tolypocladium paradoxum	-	-	CGA_002916505	–	>Tolypocladium_paradoxum_CGA_00290116505_ GGGCCCGAGTTGTAATTTGCAGAGGATGCTTTTGGCGCGGCGCCTTCCGAGTTCCCTGGA ACGGGACGCCACAGAGGGTGAGAGCCCCGTCTGGTCGGACGCCAAGCCAGTGTAAAGCTC CTTCGACGAGTCGAGTAGTTTGGGAATGCTGCTCTAAATGGGAGGTATATGTCTTCTAAA GCTAAATACCGGCCAGAGACCGATAGCGCACAAGTAGAGTGATCGAAAGATGAAAAGCAC TTTGAAAAGAGGGTTAAACAGTACGTGAAATTGTTGAAAGGGAAGCGTTTGTGACCAGAC TTGGGCCCGGCGAATCATCCAGCGTTCTCGCTGGTGCACTTCGCCGGGCTCA…	>Tolypocladium_paradoxum_CGA_00290116505_ ttatcgtttatttgatagcaccttactacttggataaccgtggtaattctagagctaata catgctaaaaatcccgacttcggaagggatgtatttattagattaaaaaccaatgccccc tgggctctctggtgattcatgataacttcgcggatcgcacggccttgcgccggcgatggc tcattcaaatttcttccctatcaactttcgatgtttgggtagtggccaaacatggttgca acgggtaacggagggttagggctcgaccccggagaaggagcctgagaaacggctactaca tccaaggaaggcagcaggcgcgcaaattacccaatcccgacacggggaggta…	–	>Tolypocladium_paradoxum_CGA_00290116505_ TGCCATAACTGCAGCAAGGTGTTGGCCGATACTGTTAGTCTATGCTGCTTTCTTGCAAGG TGTTCGAGCTTCGTATGATACTGACCCGATTTTACACAGAGCGACCCCGAGTTTGTCGCT GCCATCAACACACGGGACCCCAAGCTTCGCTTCAACCGTGTCTGGTCCGTTTGCAAGAAG AAGCGCAAGTGCGAGAACGAGGATCGCCAGAAAAAGGACGATGAGGATTTCATACCGGGA ATGAAGACTCATAGTTGCAACAACCACGGTGGTTGCGGCAACTTGCAGCCCTTGGTGCGG CAGGCTGCGCTTCAACTCAAGGCTGCCTTTGACGTGGCCCAGGAAGACGGCC…	Quandt et al. 2018
Ophiocordyceps amazonica	Insecta	Orthoptera	Ophama2026	–	KJ917571	KJ917562	KM411989	KP212902	Sanjuan et al. 2015
Ophiocordyceps evansii	Insecta	Hymenoptera	Ophsp 858	–	KC610770	KC610796	KC610736	KP212916	Sanjuan et al. 2015
Ophiocordyceps fulgoromorphila	Insecta	Hemiptera	Ophara717	–	KC610760	KC610794	KC610729	KF658676	Sanjuan et al. 2015
Ophiocordyceps melolonthae	Insecta	Coleoptera	Ophgrc679	–	KC610768	–	KC610744	KF658666	Sanjuan et al. 2015
Ophiocordyceps tricentri	Insecta	Hemiptera	–	–	AB027376	AB027330	–	–	Sanjuan et al. 2015
Ophiocordyceps longissima	Insecta	Hemiptera	NBRC 108989	AB968407	AB968421	AB968394	AB968585	–	Sanjuan et al. 2015
Tolypocladium ophioglossoides	-	-	NBRC 106332	JN943322	JN941409	JN941732	–	JN992466	Schoch et al. 2012
Ophiocordyceps clavata	Insecta	Coleoptera	NBRC 106962	JN943328	JN941415	JN941726	AB968587	JN992460	Schoch et al. 2012
Ophiocordyceps aphodii	Insecta	Coleoptera	ARSEF 5498	–	DQ518755	DQ522541	DQ522323	–	Spatafora et al. 2007
Ophiocordyceps brunneipunctata	Insecta	Coleoptera	OSC 128576	–	DQ518756	DQ522542	DQ522324	DQ522369	Spatafora et al. 2007
Ophiocordyceps melolonthae	Insecta	Coleoptera	OSC 110993	–	DQ518762	DQ522548	DQ522331	DQ522376	Spatafora et al. 2007
Ophiocordyceps nutans	Insecta	Hemiptera	OSC 110994	–	DQ518763	DQ522549	DQ522333	DQ522378	Spatafora et al. 2007
Ophiocordyceps ravenelii	Insecta	Coleoptera	OSC 110995	–	DQ518764	DQ522550	DQ522334	DQ522379	Spatafora et al. 2007
Ophiocordyceps sphecocephala	Insecta	Hymenoptera	OSC 110998	–	DQ518765	DQ522551	DQ522336	DQ522381	Spatafora et al. 2007
Ophiocordyceps unilateralis	Insecta	Hymenoptera	OSC 128574	–	DQ518768	DQ522554	DQ522339	DQ522385	Spatafora et al. 2007
Ophiocordyceps stylophora	Insecta	Coleoptera	OSC 111000	JN049828	DQ518766	DQ522552	DQ522337	DQ522382	Spatafora et al. 2007
Hymenostilbe aurantiaca	Insecta	Hymenoptera	OSC 128578	JN049833	DQ518770	DQ522556	DQ522345	DQ522391	Spatafora et al. 2007
Ophiocordyceps acicularis	Insecta	Coleoptera	OSC 110988	–	EF468804	EF468951	EF468745	EF468853	Sung et al. 2007
Ophiocordyceps elongata	Insecta	Lepidoptera	OSC 110989	–	EF468808	–	EF468748	EF468856	Sung et al. 2007
Ophiocordyceps irangiensis	Insecta	Hymenoptera	OSC 128579	–	EF469076	EF469123	EF469060	EF469089	Sung et al. 2007
Ophiocordyceps konnoana	Insecta	Coleoptera	EFCC 7315	–	–	EF468959	EF468753	EF468861	Sung et al. 2007
Ophiocordyceps rhizoidea	Insecta	Isoptera	NHJ 12529	–	EF468824	EF468969	EF468765	EF468872	Sung et al. 2007
Ophiocordyceps robertsii	Insecta	Lepidoptera	KEW 27083	–	EF468826	–	EF468766	–	Sung et al. 2007
Ophiocordyceps superficialis	Insecta	Coleoptera	MICH 36253	–	–	EF468983	–	EF468883	Sung et al. 2007
Ophiocordyceps variabilis	Insecta	Diptera	OSC 111003	–	EF468839	EF468985	EF468779	EF468885	Sung et al. 2007
Ophiocordyceps nigrella	Insecta	Lepidoptera	EFCC 9247	JN049853	EF468818	EF468963	EF468758	EF468866	Sung et al. 2007
Ophiocordyceps sinensis	Insecta	Lepidoptera	EFCC7287	JN049854	–	EF468971	EF468767	EF468874	Sung et al. 2007
Aglaia infecting fungus (Ophiocordyceps sp. BRM1)	-	-	-	>Aglaia_fungus_ITS CGTCCCTGCCCTTTGTACACACCGCCCGTCGCTACTACCGATTGAATGGCTCAGTGAGGCGTCCGGACTGGCCCAGAGAGGTGGGCAGCCACCACTCAGGGCCGGAAAGCTCTCCAAACTCGGTCATTTAGAGGAAGTAAAAGTCGTAACAAGGTCTCCGTTGGTGAACCAGCGGAGGGATCATTACCGAGTTGCCCCAACTCCCAAGCCCCGTGCGAACCGTACCACACGCGTTGCCTCGGCGGGACCGCCCCGGCGCCCGCGGCGGCCCGGACCAAGGCGCCCGCCGGAGGACCCCCAGACTCTCCTGTCGCAGCGGCATTGCTCTCCGAGTCCAGGCGAAATAGCAAATGAATCAAAACTTTCAACAACGGAC	>Aglaia_fungus_LSU GTAATTTGCAGAGGACGCTTCTGGCGCGGCGCCTTCCGAGTTCCCTGGAACGGGACGCCATAGAGGGTGAGAGCCCCGTCTGGTCGGACGCCCAGCCTCCGTGAAGCTCCCTCGACGAGTCGAGTAGTTTGGGAATGCTGCTCTAAATGGGAGGTATATGTCTTCTAAGGCTAAATACCGGCCAGAGACCGATAGCGCACAAGTAGAGTGATCGAAAGATGAAAAGCACTTTGAAAAGAGGGTTAAACAGTACGTGAAATTGTTGAAAGGGAAGCGCTCGTGACCAGACTCGGGCGCGGCGGATCATCCGGCGTTCTCGCCGGTGCACTCCGCCGCGCCCGGGCCAGCATCGGCTCGCCGCGGGGGACAAAGGCGCCGGG…	>Aglaia_fungus_SSU CCCCGATCCGCCCGAGCTTTGCGCAAACGTCCCTTGACCCGAACGACAGCTGCCCCCGCC TCGATTCCGCCTTGCGGGTCGTGCGGGAGCGGGCGTCGCCGAGGAGTGCTACCTGGTTGA TCCTGCCAGTAGTCATATGCTTGTCTCAAAGATTAAGCCATGCATGTCTAAGTATAAGCA ATTTATACAGTGAAACTGCGAATGGCTCATTAAATCAGTTATCGTTTATTTGATAGTTCC TTTACTACATGGTATAACTGTGGTAATTCTAGAGCTAATACATGCTTAAAATCTCGACCC TTTGGAAGAGATGTATTTATTAGATAAAAAATCAATGTCTTCGGACTCTTTGATGATTCA TAATAACTTTTCGA…	>Aglaia_fungus_TEF1a GTGGCCTTCGTCCCCATCTCCGGCTTCAACGGCGACAACATGATTGAGGCCTCCACCAACTGCCCCTGGTACAAGGGCTGGGAGAAGGAGGTCAAGTCCGGCAAGGCCACCGGCAAGACTTTGCTCGAGGCTATCGACTCCATCGAGCCCCCCAAGCGTCCCTCCGACAAGCCGCTGCGCCTGCCCCTCCAGGATGTGTACAAGATTGGCGGTATCGGAACGGTCCCCGTCGGCCGTGTCGAGACCGGCGTCATCAAGCCCGGCATGGTTGTCACCTTTGCTCCTGCCAACGTCACCACCGAAGTCAAGTCCGTCGAGATGCACCACGAGCAGCTTTCCGAGGGTCTCCCCGGCGACAACGTTGGCTTCAACGTGAAG…	–	This study
Ophiocordyceps pseudolloydii	Insecta	Hymenoptera	MRCIF59	EU573351	–	–	–	–	Unpublished (Data from NCBI)
Ophiocordyceps australis	Insecta	Hymenoptera	TSJ774a	KF937351	KJ130988	–	–	–	Unpublished (Data from NCBI)
Ophiocordyceps crinalis	Insecta	Lepidoptera	HIMGD17327	EU149926	–	–	–	–	Unpublished (Data from NCBI)
Ophiocordyceps xuefengensis	Insecta	Lepidoptera	GZUH2012HN19	KC631803	–	KC631788	KC631794	KC631799	Wen et al. 2013
Ophiocordyceps camponoti-rufipedis	Insecta	Hymenoptera	Ophun1	–	>Ophiocordyceps_camponoti-rufipedis _Ophun1_ GGCGCCCGAGTTGTAATCTGCAGAGGACGCCTCTGGCGCGGCGCCGTCCGAGTTCCCTGG AACGGGACGCCGGAGAGGGTGAGAGCCCCGTACGGTCGGACGCCCAGCCTGTGTGAGGCT CCTTCGGCGAGTCGAGTAGTTTGGGAATGCTGCTCAAAACGGGAGGTATACGCCTTCTAA AGCTAAATACCGGCCGGAGACCGATAGCGCACAAGTAGAGTGATCGAAAGATGAAAAGCA CTTTGAAAAGAGGGTTAAACAGTACGTGAAATTGTTGAAAGGGAAGCGCTCGCGGCCAGA CTCGGGCCCGGGGGATCATCCGGCGCTCGCGCCGGTGCACTCCGCCGGG…	>Ophiocordyceps_camponoti-rufipedis _Ophun1_ ttatcgtttatttgatagcacctttttacttgggtaaccgtggtaattctagagctaata catgctaaaaatcccgactccggaagggatgtgtttattagattcaaaaccaatgccccc tgggctccctggtgaatcatgataaccgctcgaatcgcacggccttgcgctggcgatggt tcattcaaatttcttccctatcaactttcgatgtttgggtagtggccaaacatggttgca acgggtaacggagggttagggctcgaccccggagaaggagcctgagaaacggctactaca tccaaggaaggcagcaggcgcgcaaattacccaatcccgacacggggag…	>Ophiocordyceps_camponoti-rufipedis _Ophun1_ ATCAAGAACATGATCACTGGCACCTCTCAGGCCGACTGCGCCATCCTCATCATTGCCGCC GGCACTGGCGAGTTCGAGGCTGGTATCTCCAAGGATGGCCAGACCCGAGAGCACGCCCTG CTCGCCTACACCCTCGGTGTGAAGCAGCTCATCGTCGCCATCAACAAGATGGACACGGCC AAGTGGGCCCAGTCCCGTTACGAGGAAATCATCAAGGAGACGTCCAACTTCATCAAGAAG GTCGGCTACAACCCAAAGACTGTCCCCTTCGTCCCCATCTCCGGCTTCAACGGCGACAAC ATGCTTGCCGCCTCCTCCAACTGCCCCTGGTACAAGGGCTGGGAGAAGG…	>Ophiocordyceps_camponoti-rufipedis _Ophun1_ TGCCATAACTGCAGCAAGGTGTTGGCCGATACTGTCAGTTTATGCTTCCCTCTTCAAGGT CTGTTTTGTCGCTGAATGATGTTTGCTGACGCGTTGTCTTTTTTGTAGAGCGACCCCGAG TTCGTGACGGCCATCAACACCAGAGACCCCAAGGCTCGCTTCAGTCACGTCTGGAACGTC TGCAAGAAGAAGAAGAGATGCGAGAACGAGGATCGACAGAACAAGGACAAGGACGAGGAG ATTGCACAGGGTCTCAAGCAGCCTCTCGCCGTTGAGAACCATGGCGGCTGCGGAAACGTC CAGCCCGCCGTGCGGCAGACGGCCTTGCAGCTCAAGGCCTCGTTCGAGG…	Will et al. 2020
Ophiocordyceps pseudolloydii	Insecta	Hymenoptera	MFLU 15–1425	MF351725	–	–	MF372758	MF372761	Xiao et al. 2017
Ophiocordyceps myrmecophila	Insecta	Hymenoptera	MFLU 16-2912	MF351726	MF372585	MF351730	MF372759	–	Xiao et al. 2017
Ophiocordyceps myrmecophila	Insecta	Hymenoptera	MFLU 16-2913	MF351727	MF372586	MF351731	–	–	Xiao et al. 2017
Ophiocordyceps thanathonensis	Insecta	Hymenoptera	MFU 16-2910	MF850375	MF850378	MF882926	MF872614	MF872616	Xiao et al. 2017
Ophiocordyceps thanathonensis	Insecta	Hymenoptera	MFU 16-2909	MF850376	MF850377	–	MF872613	MF872615	Xiao et al. 2017
