# Supplementary material for: A parasitic fungus employs mutated eIF4A to survive on rocaglate-synthesizing Aglaia plants
Source: eLife. 2023 Feb 28;12:e81302. doi: 10.7554/eLife.81302 (PMC9977294; doi:10.7554/eLife.81302)
Supplement: Supplementary file 4. — The C. orbiculare strains used in this study are listed with the strain IDs, genotypes, parental strains, and descriptions. [file elife-81302-supp4.xlsx]

## Sheet: Table S3
Strain ID	Strain name	Genotype	Parental strain	Description
-	Colletotrichum orbiculare 104-T	Wild type	-	MAFF 240422. A filamentous phytopathogenic fungus which causes anthracnose disease on cucurbitaceae plants.
CoNK1171	eIF4AWT#1	eIF4AWT::NPTII	Wild type	Transformed with pENTR4-C. orbiculare eIF4A WT. The original eIF4A CDS was replaced with synthesized wild type eIF4A CDS and the NPTII expression cassette.
CoNK1172	eIF4AWT#2	eIF4AWT::NPTII	Wild type
CoNK1173	eIF4AWT#3	eIF4AWT::NPTII	Wild type
CoNK1174	eIF4AWT#4	eIF4AWT::NPTII	Wild type
-	eIF4AWT#5	eIF4AWT::NPTII	Wild type
-	eIF4AWT#6	eIF4AWT::NPTII	Wild type
-	eIF4AWT#7	eIF4AWT::NPTII	Wild type
CoNK1181	eIF4AH153G#1	eIF4AH153G::NPTII	Wild type	Transformed with pENTR4-C. orbiculare eIF4A His153Gly. The original eIF4A CDS was replaced with eIF4A His153Gly CDS and the NPTII expression cassette.
CoNK1182	eIF4AH153G#2	eIF4AH153G::NPTII	Wild type
CoNK1183	eIF4AH153G#3	eIF4AH153G::NPTII	Wild type
CoNK1184	eIF4AH153G#4	eIF4AH153G::NPTII	Wild type
-	eIF4AH153G#5	eIF4AH153G::NPTII	Wild type
-	eIF4AH153G#6	eIF4AH153G::NPTII	Wild type
-	eIF4AH153G#7	eIF4AH153G::NPTII	Wild type
