# Supplementary material for: A parasitic fungus employs mutated eIF4A to survive on rocaglate-synthesizing Aglaia plants
Source: eLife. 2023 Feb 28;12:e81302. doi: 10.7554/eLife.81302 (PMC9977294; doi:10.7554/eLife.81302)
Supplement: Supplementary file 5. — The oligonucleotides used in this study are listed with the sequences, descriptions, and references. [file elife-81302-supp5.xlsx]

## Sheet: Table S2
Name	5'-sequence-3'	Description	Reference
qCoRIP_F	CTGGAACTGGGACTTGAAGC	C. orbiculare 60S ribosomal protein L5 gene (GeneBank: TDZ14370.1) quantification by RT-qPCR	(Gan et al., 2013)
qCoRIP_R	GCCGACACCCTGAAGAACTA
qCsCYC_F	GCTGGACCTGGAACCAACGGA	C. sativus cyclophilin gene (GeneBank: AY942800.1) quantification by RT-qPCR	(Liang et al., 2018)
qCsCYC_R	TCTAAGAGAGCTGGCCACAAT
sgRNA-pNK150UP-1_F	CTAATACGACTCACTATAGTCTAGATTAGATGCTCCTGAGTTTTAGAGCTAGAAATAGCA	DNA template syenthesis for sgRNAUP-1	This study
sgRNA-pNK150UP-2_F	CTAATACGACTCACTATAGCCGCCAGTAAATTTTTTACGGTTTTAGAGCTAGAAATAGCA	DNA template syenthesis for sgRNAUP-2	This study
sgRNA-pNK150DW-1_F	CTAATACGACTCACTATAGTCACCAACTTGAAAACAGCGGTTTTAGAGCTAGAAATAGCA	DNA template syenthesis for sgRNADW-1	This study
sgRNA-pNK150DW-2_F	CTAATACGACTCACTATAGGCCAGCTTCTCGGAGAACGGGTTTTAGAGCTAGAAATAGCA	For template syenthesis for sgRNADW-2	This study
sgDNA_2nd	AAAAGCACCGACTCGGTGCCACTTTTTCAAGTTGATAACGGACTAGCCTTATTTTAACTTGCTATTTCTAGCTCTAAAAC	DNA templetate synthesis for sgRNAs	CUGA 7 gRNA Synthesis Kit (Nippon Gene)
sgDNA_3rd	AAAAGCACCGACTCGGTGCC		CUGA 7 gRNA Synthesis Kit (Nippon Gene)
CP-Frag1_F	TCTGTACGTAGGGGCCTCGTCATGATG	Fragment 1 and 1' amplification for C. orbiculare screening by PCR	This study
CP-Frag1_R	CAGCTTTGTGCATGCTCACCCCACTTC		This study
CP-Frag2_F	TTCAAACAGGTCAGGACCGAAGC	Fragment 2 amplification for C. orbiculare screening by PCR	This study
CP-Frag2_R	CCATCTTCGAAACGAAGATCACTGGGAACAACTG		This study
CP-Frag3_F	ACCCAGAATGCACAGGTACACTTGTTTAGAGGTAATC	Fragment 3 amplification for C. orbiculare screening by PCR	This study
CP-Frag3_R	TTGCTACGTTACTTAGCAAGCTACAGC		This study
