# Supplementary figures and images for: A parasitic fungus employs mutated eIF4A to survive on rocaglate-synthesizing Aglaia plants
Source: eLife journal article supplement (doi:10.7554/elife.81302), 2023-01-13

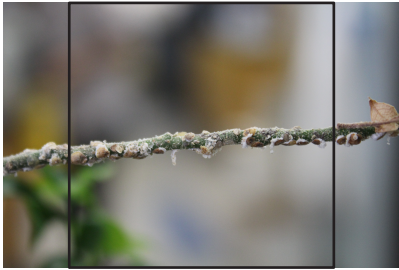

Supplement: fig1-data1 [file Figure 1A.pdf › Figure 1-source data 1/Figure 1A.pdf]

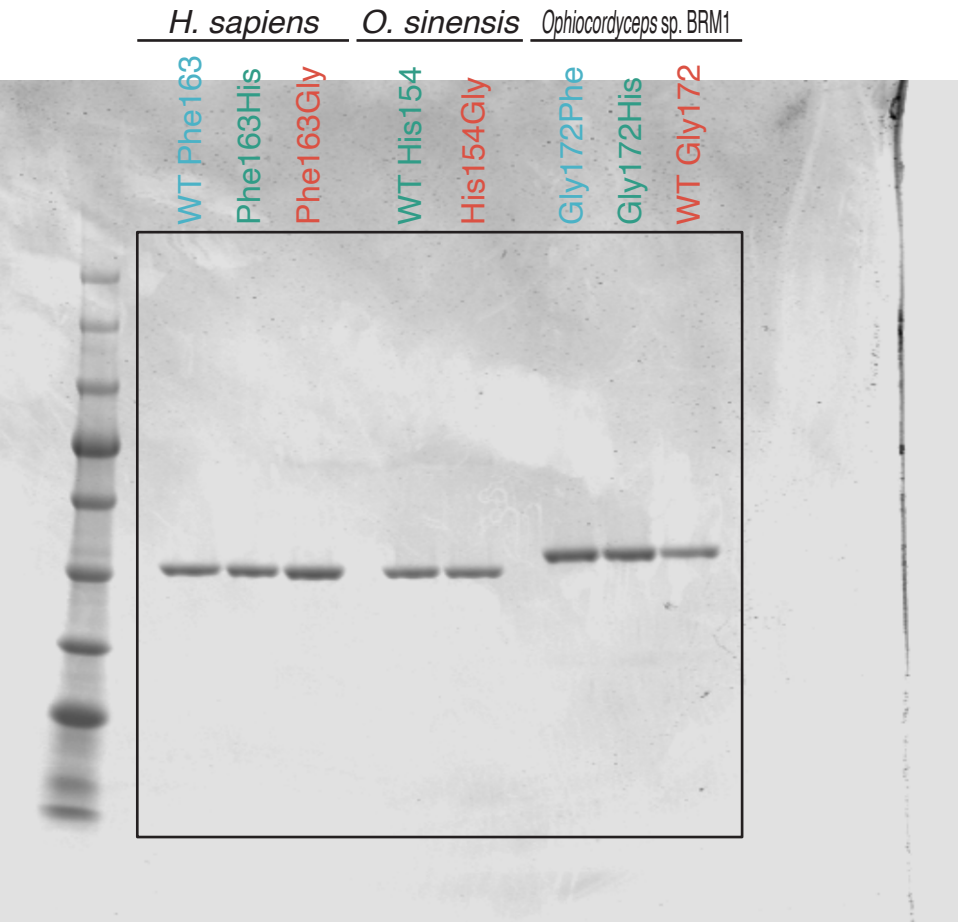

Supplement: fig2-figsupp1-data1 [file elife-81302-fig2-figsupp1-data1-v1.zip]

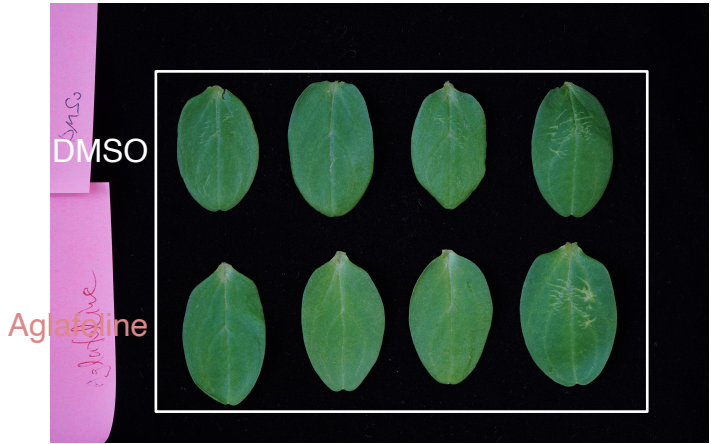

Supplement: fig4-figsupp1-data1 [file elife-81302-fig4-figsupp1-data1-v1.zip]
